# Supplementary material
Source: PubMed Central journal article supplement (PMC4663162)
Supplement: NIHMS684035-supplement-supplement_1.pdf [file NIHMS684035-supplement-supplement_1.pdf]

Supplemental Table 1. Food and nutrient intakes by craving type in early pregnancy among 2,022 participants in Project Viva

|                            | Any Cravings      |                  | Sweet            |                              | Salty            |                              | Savory           |                              | Starchy          |                              |                   |
|----------------------------|-------------------|------------------|------------------|------------------------------|------------------|------------------------------|------------------|------------------------------|------------------|------------------------------|-------------------|
|                            | Total<br>n=2022   | No<br>n=1115     | Yes<br>n=907     | None/<br>Secondary<br>n=1579 | Primary<br>n=443 | None/<br>Secondary<br>n=1797 | Primary<br>n=225 | None/<br>Secondary<br>n=1761 | Primary<br>n=261 | None/<br>Secondary<br>n=1922 | Primary<br>n=100  |
|                            | Mean +/- SD       |                  |                  |                              |                  |                              |                  |                              |                  |                              |                   |
| Calories                   | 2061+/- 67        | 2009+/-650       | 2130+/-700       | 2029+/-667                   | 2181+/-687       | 2050+/-662                   | 2154+/-759       | 2053+/-670                   | 2122+/-707       | 2053+/-673                   | 2215+/-679        |
| Carbohydrates (serv/d)     | 277.2+/-36.0      | 277.4+/-37.0     | 277.0+/-34.8     | 277.8+/-36.3                 | 275.0+/-35.0     | 276.7+/-36.2                 | 281.5+/-34.7     | 277.3+/-36.2                 | 276.3+/-34.7     | 276.8+/-36.0                 | 284.8+/-35.4      |
| Sucrose (g/d)              | 49.5+/-15.5       | 48.9+/-15.8      | 50.3+/-15.2      | 49.1+/-15.6                  | 51.0+/-15.3      | 49.4+/-15.7                  | 50.3+/-14.3      | 49.4+/-15.5                  | 50.1+/-15.9      | 49.4+/-15.6                  | 51.4+/-15.0       |
| Glucose (g/d)              | 29.8+/-10.7       | 29.7+/-10.8      | 30.0+/-10.6      | 29.8+/-10.6                  | 30.0+/-11.0      | 29.8+/-10.8                  | 30.1+/-9.5       | 29.8+/-10.7                  | 29.8+/-10.4      | 29.8+/-10.7                  | 31.3+/-10.3       |
| Fructose (g/d)             | 33.4+/-11.9       | 33.4+/-12.2      | 33.4+/-11.4      | 33.4+/-11.8                  | 33.3+/-11.9      | 33.4+/-12.0                  | 33.6+/-10.5      | 33.5 +/-11.9                 | 33.0+/-11.7      | 33.3+/-11.8                  | 34.9+/-11.9       |
| Lactose (g/d)              | 19.1+/-12.3       | 19.1+/-12.3      | 19.0+/-12.4      | 19.2+/-12.3                  | 18.6+/-12.5      | 19.0+/-12.3                  | 19.4+/-12.8      | 19.3+/-12.5                  | 17.6+/-10.7      | 19.1+/-12.4                  | 19.4+/-12.0       |
| Glycemic Load              | 14759 +/-<br>2274 | 14769+/-<br>2304 | 14747+/-<br>2237 | 14784+/-<br>2284             | 14668+/-<br>2238 | 14739+/-<br>2273             | 14917+/-<br>2282 | 14767+/-<br>2285             | 14700+/-<br>2202 | 14736+/-<br>2269             | 15201 +/-<br>2350 |
| Total Fat (g/d)            | 62.8+/-12.1       | 62.6+/-12.4      | 63.0+/-11.7      | 62.5+/-12.2                  | 64.0+/-11.5      | 63.0+/-12.1                  | 61.4+/-11.6      | 62.7+/-12.1                  | 63.4+/-11.8      | 62.9+/-12.1                  | 60.3+/-11.4       |
| Saturated Fat (g/d)        | 23.4+/-5.5        | 23.4+/-5.7       | 23.3+/-5.4       | 23.2+/-5.6                   | 23.8+/-5.4       | 23.5+/-5.6                   | 22.5+/-5.4       | 23.4+/-5.6                   | 23.4+/-5.3       | 23.4+/-5.6                   | 22.6+/-5.2        |
| Monounsaturated Fat (g/d)  | 23.7+/-5.4        | 23.6+/-5.4       | 23.8+/-5.3       | 23.5+/-5.4                   | 24.3+/-5.2       | 23.7+/-5.4                   | 23.2+/-5.5       | 23.6+/-5.4                   | 23.9+/-5.5       | 23.7+/-5.4                   | 22.8+/-5.1        |
| Trans Fat (g/d)            | 2.1+/-0.7         | 2.1+/-0.7        | 2.2+/-0.7        | 2.1+/-0.7                    | 2.2+/-0.7        | 2.1+/-0.7                    | 2.1+/-0.7        | 2.1+/-0.7                    | 2.2+/-0.7        | 2.1+/-0.7                    | 2.1+/-0.7         |
| Polyunsaturated Fat (g/d)  | 13.5+/-3.5        | 13.4+/-3.6       | 13.6+/-3.4       | 13.5+/-3.5                   | 13.7+/-3.6       | 13.5+/-3.5                   | 13.4+/-3.2       | 13.5+/-3.5                   | 13.8+/-3.6       | 13.5+/-3.5                   | 12.9+/-3.1        |
| N-3 Fatty Acids (g/d)      | 1.13+/-0.52       | 1.12+/-0.42      | 1.14+/-0.62      | 1.12+/-0.44                  | 1.16+/-0.74      | 1.14+/-0.54                  | 1.07+/-0.37      | 1.12+/-0.46                  | 1.22+/-0.83      | 1.13+/-0.49                  | 1.14+/-0.96       |
| N-6 Fatty Acids (g/d)      | 11.9+/-3.1        | 11.8+/-3.2       | 11.9+/-3.0       | 11.8+/-3.1                   | 12.0+/-3.1       | 11.9+/-3.2                   | 11.8+/-2.9       | 11.8+/-3.1                   | 12.1+/-3.0       | 11.9+/-3.2                   | 11.2+/-2.6        |
| Protein (g/d)              | 87.3+/-15.0       | 87.5+/-15.0      | 87.0+/-14.9      | 87.5+/-15.0                  | 86.5+/-14.8      | 87.4+/-14.9                  | 86.3+/-15.5      | 87.3+/-15.0                  | 87.2+/-14.8      | 87.4+/-15.0                  | 84.7+/-14.9       |
| Calcium (g/d)              | 1312 +/-418       | 1316+/-430       | 1306+/-401       | 1317+/-418                   | 1292+/-415       | 1310+/-422                   | 1328+/-383       | 1316+/-422                   | 1281+/-387       | 1309+/-417                   | 1363+/-420        |
| Dietary Fiber (g/d)        | 19.8+/-5.8        | 19.8+/-5.9       | 19.8+/-5.6       | 19.9+/-5.7                   | 19.4+/-5.9       | 19.7+/-5.8                   | 20.5+/-5.5       | 19.8+/-5.8                   | 20.0+/-5.8       | 19.8+/-5.7                   | 20.1+/-6.0        |
| Cereals/Br/Starch (serv/d) | 19.8+/-5.8        | 19.8+/-5.9       | 19.8+/-5.6       | 19.9+/-5.7                   | 19.4+/-5.9       | 19.7+/-5.8                   | 20.5+/-5.5       | 19.8+/-5.8                   | 20.0+/-5.8       | 19.8+/-5.7                   | 20.1+/-6.0        |
| Vegetables (serv/d)        | 2.9+/-1.8         | 2.9+/-1.7        | 3.0+/-1.8        | 2.9+/-1.7                    | 2.9+/-1.9        | 2.9+/-1.7                    | 3.1+/-2.2        | 2.9+/-1.7                    | 3.1+/-2.1        | 2.9+/-1.8                    | 2.9+/-1.7         |
| Fried food (times/w)       | 0.92+/-0.81       | 0.88+/-0.73      | 0.98+/-0.90      | 0.91+/-0.78                  | 0.97+/-0.89      | 0.91+/-0.77                  | 1.02+/-1.07      | 0.92+/-0.81                  | 0.98+/-0.79      | 0.92+/-0.81                  | 0.92+/-0.79       |
